# Supplementary material for: A tough shape memory polymer with triple-shape memory and two-way shape memory properties
Source: Royal Society of Chemistry journal article supplement (doi:10.1039/c3ta15117d), 2014-01-01
Supplement: c3ta15117d.pdf [file c3ta15117d.pdf]

## Supporting Information

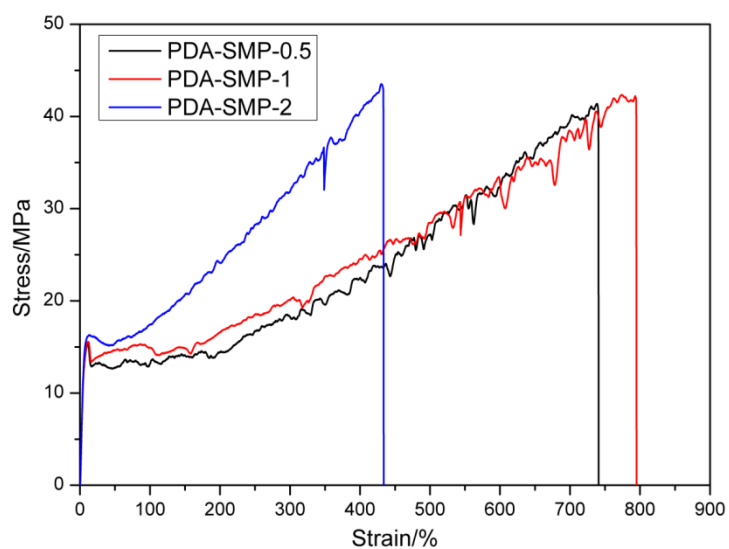

Fig. S1 Stress-strain curves of PDA-SMP polymer network

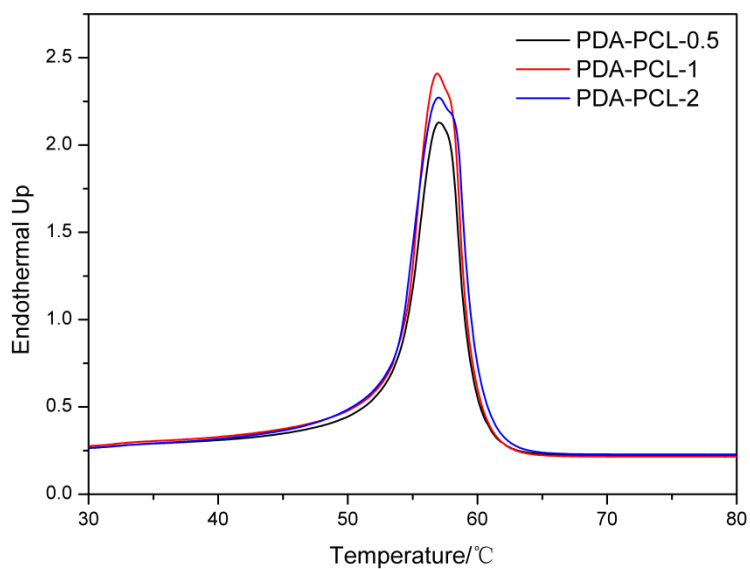

Fig. S2 DSC curves of PDA-PCLs with second heating run
